1 The bacillithiol pathway is required for biofilm formation in *Staphylococcus aureus*

2

3 Megha Gulati,<sup>a</sup> Jason Thomas,<sup>b</sup> Mamta Rawat,<sup>b#</sup> and Clarissa J. Nobile<sup>a#</sup>

4

5 <sup>a</sup>Department of Molecular and Cell Biology, University of California Merced, Merced, CA, USA

6 <sup>b</sup>Department of Biology, California State University-Fresno, Fresno, CA, USA

7

8

9

10

11

12 Running Head: Bacillithiol is required for *S. aureus* biofilms

13

14 #Address correspondence to Mamta Rawat, [mrawat@csufresno.edu](mailto:mrawat@csufresno.edu) and Clarissa J. Nobile,

15 [cnobile@ucmerced.edu](mailto:cnobile@ucmerced.edu)

16

17

18

19 Abstract word count: 239

20 Text word count: 3249

21

22

23

## 24 **Abstract**

25 *Staphylococcus aureus* is a major human pathogen that can cause infections that range from  
26 superficial skin and mucosal infections to life threatening disseminated infections. *S. aureus* can  
27 attach to medical devices and host tissues and form biofilms that allow the bacteria to evade the  
28 host immune system and provide protection from antimicrobial agents. To counter host-generated  
29 oxidative and nitrosative stress mechanisms that are part of the normal host responses to invading  
30 pathogens, *S. aureus* utilizes low molecular weight (LMW) thiols, such as bacillithiol (BSH).  
31 Additionally, *S. aureus* synthesizes its own nitric oxide (NO), which combined with its  
32 downstream metabolites may also protect the bacteria against specific host responses. We have  
33 previously shown that LMW thiols are required for biofilm formation in *Mycobacterium*  
34 *smegmatis* and *Pseudomonas aeruginosa*. Our data show that the *bshC* mutant, which is defective  
35 in the last step of the bacillithiol pathway and lacks BSH, is impaired in biofilm formation. We  
36 also identify a putative *S*-nitrosobacillithiol reductase (BSNOR), similar to a *S*-nitrosomycothioliol  
37 reductase found in *M. smegmatis*, and show that the BSNOR mutant has reduced levels of BSH  
38 and decreased biofilm formation. Our studies also show that NO plays an important role in biofilm  
39 formation and that acidified sodium nitrite severely reduces biofilm thickness. These studies  
40 provide insight into the roles of oxidative and nitrosative stress mechanisms on biofilm formation  
41 and indicate that bacillithiol and nitric oxide are key players in normal biofilm formation in *S.*  
42 *aureus*.

43

## 44 **Importance**

45 *Staphylococcus aureus* is the most frequent cause of biofilm-associated infections in hospital  
46 settings. The biofilm mode of growth allows the pathogen to escape the host immune response and

47 is extremely difficult to combat, as biofilms are highly resistant to physical and chemical stressors.  
48 As outbreaks of antibiotic-resistant bacterial strains become more commonplace, it is essential to  
49 understand the pathways involved in biofilm formation in order to target this important virulence  
50 factor. Low molecular weight thiols enable *S. aureus* to combat oxidative and nitrosative stress  
51 mechanisms that are used by host cells to defend against infection. Our findings indicate that  
52 bacillithiol and nitric oxide, which are produced by *S. aureus* to combat these host generated  
53 stressors, are important for biofilm development, and that disruption of these pathways results in  
54 biofilm defects. In the long term, this work may lead to new solutions to eradicate *S. aureus*  
55 biofilms in the clinic.

56

## 57 **Introduction**

58 *Staphylococcus aureus* is a gram-positive, spherical-shaped bacteria that is a major human  
59 pathogen capable of causing both superficial as well as life-threatening systemic and chronic  
60 infections in humans (1, 2). *S. aureus* is also a commensal microorganism that can reside on the  
61 skin, and within the nostrils, throat, perineum and axillae of 25-30% of healthy humans (3-6). One  
62 *S. aureus* virulence factor that is particularly challenging to manage in hospital settings is its ability  
63 to form biofilms, surface-attached communities of cells that are encased in an extracellular  
64 polymeric matrix (7). These biofilms can form on both biotic and abiotic surfaces and are more  
65 resistant to antimicrobial agents and the host immune response compared to their free-floating  
66 (planktonic) counterparts (7-10). *S. aureus* was one of the first microbial species found to grow as  
67 a biofilm on medical devices in clinical settings and is responsible for frequent episodes of  
68 bacteremia and sepsis in hospital settings (11). In fact, *S. aureus* biofilms, including those formed  
69 by methicillin-resistant *S. aureus* (MRSA) strains, are the leading cause of hospital-acquired

70 sepsis, commonly observed in patients with burn wounds and implanted or indwelling medical  
71 devices (12-16).

72         The host immune system employs various mechanisms to recognize and counter infections  
73 by *S. aureus* and other invading pathogens (17-19). Neutrophils and macrophages are among the  
74 first lines of defense against epithelial invasion by *S. aureus*, leading to a release of reactive oxygen  
75 species (ROS) to combat *S. aureus* colonization (20-22). In particular, activated neutrophils mount  
76 an oxidative burst, where NADPH oxidase produces ROS, such as superoxide ( $O_2^-$ ) and hydroxyl  
77 radical ( $\cdot OH$ ) (23, 24). Consistent with this protective oxidative burst, mouse models of chronic  
78 granulomatous disease that show a severe reduction in NADPH oxidase are highly susceptible to  
79 infections by *S. aureus* (25, 26). *S. aureus* proteins are particularly vulnerable to damage by ROS,  
80 where ROS oxidize the thiol residues in cysteine moieties (18). Neutrophils also release cytokines  
81 and chemokines, which in turn can activate macrophages at the site of *S. aureus* infection.  
82 Activated macrophages release high concentrations of nitric oxide (NO), which can combine with  
83 superoxide to form highly toxic anions, such as peroxynitrite ( $OONO^-$ ) (27). These high  
84 concentrations of NO and other reactive nitrogen species (RNS), which are formed by reactions of  
85 NO with other oxidants, together produce nitrosative stress that is useful in eliminating invading  
86 bacterial cells (24). To counter these oxidative and nitrosative host stress mechanisms, *S. aureus*  
87 in turn has evolved several pathogen-derived adaptive mechanisms to survive and propagate within  
88 the host (20, 28-31).

89         One pathogen-derived mechanism is the production of low molecular weight (LMW) thiols  
90 that are thought to be crucial in providing protection to cytosolic proteins against ROS, other  
91 reactive electrophilic species, antibiotics, and heavy metals (32). LMW thiols oxidize more slowly  
92 than cysteine and can play crucial roles in redox reactions and maintaining redox homeostasis (33).

93    Glutathione (GSH), a tripeptide, is the most abundant LMW thiol produced in cells of eukaryotes  
94    and many gram-negative bacteria (34, 35); most gram-positive bacteria, however, are thought to  
95    lack GSH (35). Another LMW thiol, mycothiol (MSH), was identified as the primary thiol in high  
96    G+C gram-positive bacteria (36, 37), while bacillithiol (BSH) was identified as the primary LMW  
97    thiol in the low G+C firmicutes (38). MSH and BSH differ considerably in structure from GSH by  
98    containing an amino sugar glucosamine backbone instead of a peptide backbone. BSH biosynthesis  
99    and function has been elucidated in the firmicutes *S. aureus* and *B. subtilis* (38), and *S. aureus*  
100    mutants lacking BSH have been shown to display increased sensitivities and susceptibilities to  
101    killing by oxidative stress (39, 40). One study demonstrated that BSH can reduce oxidants such as  
102    H<sub>2</sub>O<sub>2</sub> directly and that BSH may participate in a general electron relay with bacilliredoxins to  
103    reduce oxidants (41).

104            LMW thiols have also been implicated in protection against nitrosative stress (42). NO can  
105    react with GSH to form GSNO spontaneously, preventing its reaction with cysteine moieties (43).  
106    The amount of GSNO in the cell is modulated by *S*-nitrosoglutathione reductase (GSNOR), which  
107    regenerates GSH and reduces NO to ammonia, and also has a dual function as a *S*-  
108    (hydroxymethyl) glutathione dehydrogenase, participating in formaldehyde detoxification (44).  
109    The role of GSNOR in virulence and pathogenesis has been elucidated in *Streptococcus*  
110    *pneumoniae*, where GSNOR is required for survival in blood (44). Paradoxically, *S. aureus*  
111    synthesizes its own NO using a bacterial nitric oxide synthase (SaNOS), which suggests that NO  
112    may also serve some protective role for the bacterium (45). NO and its downstream metabolite,  
113    such as nitrite, may protect *S. aureus* and other NOS-producing bacteria by scavenging HClO to  
114    produce nitrate, which is less reactive (18). NO can also block cysteine oxidation by *S*-nitrosylating  
115    exposed cysteines (46) and activating catalases that reduce the concentration of harmful H<sub>2</sub>O<sub>2</sub> (18).

116 Overall, SaNOS mutants display increased endogenous ROS and superoxide levels (47). Recent  
117 studies also find that the production of NO by *S. aureus* is essential for nasal colonization and skin  
118 abscess development, and mutants lacking the enzyme show decreased virulence (48-50).  
119 Interestingly, at low concentrations NO can act as a signaling molecule in a dose-dependent  
120 manner to modulate group activities, such as biofilm formation in numerous bacterial species (51).  
121 These complex and multifactorial roles for NO at different concentrations in bacteria are analogous  
122 to that in mammalian cells (51).

123 In *S. aureus*, one report found that NO-mediated signal transduction regulates biofilm  
124 formation and dispersal, although the mechanistic details of the regulation are unknown (52). NO  
125 and nitrite (NO<sub>2</sub><sup>-</sup>) impair polysaccharide intercellular adhesion (PIA)-dependent biofilm formation  
126 in *S. aureus* (53); PIA is a major constituent of the extracellular matrix of staphylococcal biofilms.  
127 It was also recently shown that NO inhibits *S. aureus* virulence by disrupting intercellular  
128 communication between bacterial cells by targeting proteins involved in quorum sensing (46).  
129 Biofilm formation in *P. aeruginosa* is also affected by NO in a concentration dependent manner  
130 and the bacteria harbor NO-responsive regulators that modulate biofilm dispersal (54, 55).

131 We previously reported that MSH and a *S*-nitrosomycobacthiol reductase are required for  
132 biofilm formation in *Mycobacterium smegmatis* (56). We also recently reported that a *P.*  
133 *aeruginosa* mutant lacking GSH is defective in biofilm formation (57). These studies indicate that  
134 regardless of the structure of the LMW thiols, these thiols play important roles in biofilm formation  
135 in diverse bacterial species. Here, we report a new role for BSH in *S. aureus* biofilms. We show  
136 that like GSH and MSH mutants, BSH mutants are also impaired in biofilm formation. We confirm  
137 that NO is involved in biofilm formation and identify a putative *S*-nitrosobacillithiol reductase in  
138 *S. aureus*. Overall, both ROS and RNS stressors are encountered by *S. aureus* biofilms (23),

139 however the detailed mechanisms by which biofilms counter these stressors and how thiols play a  
140 role in response to them are unknown.

141

## 142 **Results**

143 ***S. aureus* contains a putative *S*-nitrosobacillithiol reductase.** Recently, we described the  
144 characterization of a *M. smegmatis* mutant disrupted in *S*-nitrosomycobactin reductase  
145 (MSMEG\_4340) (56). This mutant along with mutants lacking the LMW thiols, MSH and  
146 ergothioneine (ESH), was more susceptible to *S*-nitrosoglutathione (GSNO) (56). Since MSH is  
147 structurally similar to BSH, we reasoned that the *S*-nitrosobacillithiol reductase (BSNOR) would  
148 be similar in sequence to the mycobacterial protein. MSMEG\_4340 amino acid sequence and  
149 BLASTp analysis was used to identify the protein with the most amino acid identity/similarity in  
150 *S. aureus* (strain SAUSA300\_FPR375). ORF SAUSA300\_0055 contained the most identity at  
151 35% (127/357) and similarity at 54% (193/357) with 96% coverage to MSMEG\_4340 (E-value =  
152  $1e^{-72}$ ). We obtained a *S. aureus* USA300\_FPR375 LAC JE2 transposon mutant disrupted in this  
153 ORF from the “Network on Antimicrobial Resistance in *Staphylococcus aureus*” through BEI  
154 Resources to characterize its role in biofilm formation and response to oxidative and nitrosative  
155 stressors. Under standard growth conditions in rich TSB media, the mutant grew similar to  
156 wildtype (WT). Surprisingly, the mutant also grew similarly to WT when treated with GSNO and  
157 sodium nitrite (Supplemental Figure 1). Since *S*-nitrosothiol reductases have a dual activity as  
158 formaldehyde dehydrogenases (58, 59), growth on formaldehyde was also assessed, and we found  
159 that there was no difference in growth from WT (Supplemental Figure 1).

160

161 **MIC for Diamide is higher under biofilm conditions compared with planktonic growth.** We  
162 determined the MIC for diamide, a thiol oxidant, DTT, a reductant, and sodium nitrite, which  
163 releases NO chemically in an acidic solution at pH less than 7, to cause nitrosative stress (60) for  
164 the wildtype (WT) *S. aureus* strain under both planktonic and biofilm conditions. The MIC was  
165 3.91 mM, 250 mM, and 31.25 mM for diamide, DTT, and sodium nitrite, respectively for WT  
166 grown under planktonic culture conditions (Table 1). The MIC for DTT and sodium nitrite was  
167 the same for the WT grown under biofilm conditions (Table 1). There was an approximate two-  
168 fold increase in the WT MIC for diamide under biofilm conditions, indicating that biofilms are  
169 more resistant to this oxidant.

170

171 **Bacillithiol levels decrease in the BSNOR mutant upon treatment with sodium nitrite.** Since  
172 BSH can buffer NO by forming BSNO, we measured BSH levels upon exposure to sodium nitrite  
173 in the WT and BSNOR transposon mutant. As the MIC for sodium nitrite was 31.25 mM, we chose  
174 20 mM sodium nitrite as the sublethal concentration for testing the effect of sodium nitrite on BSH  
175 levels. Treatment with 20 mM sodium nitrite did not cause cell death as indicated by a lack of  
176 change in CFUs before or after 30 mins of sodium nitrite treatment in both WT and BSNOR mutant  
177 strains. However, treatment with sodium nitrite resulted in a decrease in BSH levels from 1.21 to  
178 0.81  $\mu\text{mol/g}$  dry weight in the WT and a decrease in BSH levels from 1.15 to 0.62  $\mu\text{mol/g}$  dry  
179 weight in the BSNOR transposon mutant. There was no difference in BSH levels in the untreated  
180 WT and BSNOR mutant, but the BSNOR mutant had significantly less BSH levels relative to WT  
181 after exposure to sodium nitrite (Figure 1).

182



183 **Sodium nitrite has no effect on *bshC* and BSNOR expression.** To determine if the decrease in  
184 BSH was due to a decrease in BSH biosynthesis, *bshC* expression levels were quantified using  
185 qPCR on WT cultures treated with sodium nitrite. At 5 min post-treatment, *bshC* is repressed  
186 (0.47) and remains repressed even after 30 min of sodium nitrite treatment. This data indicates that  
187 sodium nitrite causes repression of BSH biosynthesis through transcriptional control (Figure 2).  
188 Surprisingly, BSNOR expression does not change after 5 min or 30 min of sodium nitrite exposure.  
189 The positive control, the catalase *katA*, is induced three-fold (53).

190 We also checked *bshC* and BSNOR expression after treatment with oxidants (Figure 2).  
191 Upon exposure to hydrogen peroxide, BSNOR is induced two-fold while *katA* is only induced  
192 slightly (1.51) and *bshC* is repressed (0.55). Neither BSNOR nor *bshC* are affected by treatment  
193 with the lipid peroxide, cumene hydroperoxide, and *katA* is induced weakly (1.36). Treatment  
194 with the thiol oxidant, diamide, results in a slight upregulation of BSNOR (1.5), upregulation of  
195 *bshC* (4-fold), and no change in *katA* expression.

196  
197 **BshC and BSNOR are needed for normal biofilm development.** To determine if BshC and  
198 BSNOR are needed for biofilm formation, we tested the *bshC* and BSNOR transposon mutants  
199 and compared them with WT. Biofilms were allowed to develop for 24 hours, at 37°C on  
200 polystyrene plates and imaged using confocal scanning laser microscopy (CSLM). Our results  
201 show that either gene deletion results in a reduced biofilm depth (~46 μm) compared to the  
202 wildtype biofilm (~80 μm) (Figure 3).

203  
204 **Diamide, DTT, and sodium nitrite reduce biofilm formation in *S. aureus*.** To determine if  
205 oxidative, reductive, and nitrosative stressors can inhibit biofilm formation, we performed a

206 biofilm MIC assay on polystyrene plates using a sustained inhibition biofilm assay (61), where the  
207 compound (diamide, DTT, or nitrite) is present during cell adherence and during the period of  
208 biofilm formation (24 hr). Our results show that 7.81 mM of diamide, 250 mM DTT, or 31.25 mM  
209 of sodium nitrite completely inhibits wild type biofilm formation in wildtype,  $\Delta bshC$ , and  $\Delta bsnoR$   
210 strains (Table 1).

211 We also visualized the WT biofilm formed in the presence of sublethal concentrations of  
212 diamide, DTT and sodium nitrite by CSLM. Our results indicated that even sublethal  
213 concentrations of DTT (150 mM) severely reduced biofilm thickness to  $\sim 20 \mu\text{m}$  (Figure 4B, 4E)  
214 and sublethal concentrations of diamide (1.95 mM) reduced biofilm thickness to  $\sim 35 \mu\text{m}$  (Figure  
215 4C, 4F). Since acidified TSB media was used for sodium nitrite treatments, we tested whether the  
216 decrease in biofilm thickness was due to the pH or sodium nitrite. Our results show that acidified  
217 TSB media reduces biofilm thickness to  $\sim 45 \mu\text{m}$  compared with  $\sim 80 \mu\text{m}$  biofilms formed in  
218 standard TSB media (Figure 4A, 4D and Figure 5A, 5C). However, sodium nitrite further reduced  
219 biofilm thickness to  $\sim 10 \mu\text{m}$  in acidified TSB media (Figure 5B).

220

## 221 **Discussion**

222 A number of studies have implicated LMW thiols in biofilm formation. Mutants defective for GSH  
223 production are defective for biofilm formation in *P. aeruginosa* (57) and a mutant defective in  
224 MSH production is defective for biofilm formation in *Mycobacterium smegmatis* (56). Moreover,  
225 the importance of thiols may not be limited to bacterial biofilms. For example, the production of  
226 GSH is upregulated in the early stages of biofilm formation by the opportunistic fungal pathogen  
227 *Candida albicans* (62). Here we report that a *S. aureus* mutant disrupted in the enzyme encoding  
228 for the third and last step of BSH biosynthesis, and thus lacking BSH, was significantly impaired

229 in biofilm formation compared to the wildtype. Treatment with diamide, a thiol oxidant, also  
230 resulted in impaired biofilm formation. We also treated the BSH mutant with the common  
231 reductant, DTT, to see if DTT could rescue the *bshC* mutant phenotype. Our results indicate that  
232 instead of complementing the mutant, the application of DTT resulted in less biofilm formation,  
233 suggesting that biofilm formation specifically requires BSH. Trivedi *et al.* reported that treatment  
234 with DTT resulted in an increase in the formation of biofilms and also an increase in intracellular  
235 thiols in *Mycobacterium tuberculosis* (63). The contradictory findings between *M. tuberculosis*  
236 biofilm formation in the Trivedi *et al.* study and *S. aureus* biofilm formation in our experiments  
237 upon DTT treatment could potentially be explained by the different concentrations of DTT used  
238 in the experiments (2-4 mM for *M. tuberculosis* and 200 mM for *S. aureus*), whereby high DTT  
239 concentrations would likely result in oxidative stress instead of reductive stress. Our results  
240 support previous studies that indicate that other reducing agents, such as  $\beta$ -mercaptoethanol and  
241 cysteine inhibit *S. aureus* biofilm formation, although they were found not to affect the initial  
242 adhesion step of biofilm formation (64).

243 Biofilm formation may be connected to the interaction of LMW thiols and NO. It is likely  
244 that NO interacts with BSH during *S. aureus* biofilm formation as our results indicate that the  
245 putative BSNOR mutant, which shows a decrease in biofilm formation, also has reduced BSH  
246 levels after treatment with acidified sodium nitrite. It is known that NO reacts with GSH to form  
247 GSNO, which may serve as a reservoir for NO or conversely sequester GSH so that it is  
248 unavailable to the cell (65). NO can *S*-nitrosylate proteins directly through a radical-mediated  
249 pathway or indirectly via higher oxides of NO, and may compete with *S*-glutathionylation of  
250 exposed cysteines (66). Moreover, GSH can react with protein *S*-nitrosothiols leading to either  
251 denitrosylation or *S*-glutathionylation (67). Schlag *et al.*, 2007 demonstrated nitrite dependent

252 inhibition of biofilm formation in *S. aureus* with repression of the *icaADBC* gene cluster,  
253 mediated by IcaR (53), although acidified sodium nitrite was not used in these experiments.  
254 Genes involved in DNA repair, reactive oxygen intermediates (ROI), RNS detoxification, and  
255 iron homeostasis were induced, and preformed biofilms could be eradicated by the addition of  
256 nitrite (53). Major *et al* further demonstrated that acidified sodium nitrite could inhibit biofilm  
257 formation and kill planktonic cultures grown aerobically and anaerobically in *S. aureus*, *P.*  
258 *aeruginosa* and *Burkholderia cepacia* (68). Our results also show that acidified sodium nitrite  
259 causes an inhibition of biofilm formation.

260         Since levels of *S*-nitrosothiols are modulated by *S*-nitrosothiol reductase, which reduces  
261 the GSNO to ammonia or other reduced nitrogen species (58), we measured biofilm formation in  
262 a putative BSNOR mutant and found that this mutant is defective in biofilm formation. However,  
263 the BSNOR mutant was not impaired in growth on formaldehyde or nitrosative stress. Other  
264 mutants such as the MscR (dual function *S*-nitrosomycothioliol reductase and formaldehyde  
265 dehydrogenase) mutant in mycobacteria are impaired in biofilm formation and sensitive to these  
266 stressors (56). It has been noted that *S. aureus* is particularly resistant to NO and nitrosative  
267 stress as compared to other bacterial species (31). Additionally, a number of *S. aureus* genes  
268 have been annotated as aldehyde dehydrogenases, such as *adhA*, which is highly upregulated  
269 upon formaldehyde and methylglyoxal treatment (69). It has been suggested that *adhA* functions  
270 in the LMW thiol-dependent detoxification of aldehydes, but the gene product has not yet been  
271 validated as a BSNOR. Nevertheless, it is possible that there is redundancy in protection against  
272 nitrosative and formaldehyde stress in *S. aureus* that leads to a lack of growth phenotypes under  
273 these stressors for the BSNOR mutant.

274 We also assessed the gene expression of BSNOR in wildtype under nitrosative stress and  
275 observed no differences in expression levels in the presence or absence of the nitrosative stress. In  
276 *Vibrio cholerae*, GSNO reductase activity is regulated post-translationally by *S*-nitrosylation and  
277 this activity can be reversed by DTT (70). *S*-nitrosylation of GSNOR1 leading to inhibition of  
278 activity has also been documented in plants (71). In addition, in *Neisseria meningitidis*, *S*-  
279 glutathionylation of the cys54 of the thioesterase catalyzing the downstream step from *S*-  
280 formylglutathione hydrolase has been shown to decrease the activity of the enzyme (72). Together,  
281 these observations suggest that BSNOR may also be regulated post-translationally, possibly  
282 through *S*-bacillithiolation of the corresponding esterase in *S. aureus*, which would result in  
283 increased formaldehyde levels and less biofilm formation as seen in *N. meningitidis*. Interestingly,  
284 *bshC* expression is decreased under sodium nitrite and hydrogen peroxide and this likely results in  
285 a concomitant decrease in *S*-bacillithiolation in *S. aureus* under these stressors.

286 Recently Gupta *et al.* identified a transcriptional regulator, BifR, which is a member of the  
287 MarR protein family in *Burkholderia thailandensis* (73). Under oxidizing conditions, BifR forms  
288 a disulfide linked dimer of dimers, which affects its ability to bind to promoters of several genes.  
289 A mutant disrupted in BifR had enhanced biofilm formation (73). A similar redox switch  
290 controlling biofilm formation may be present in *S. aureus*. In the *bshC* and the BSNOR mutant  
291 strains, one would predict that treatment with sodium nitrite would lead to a decrease in BSH and  
292 a more oxidized cytoplasm, which would facilitate disulfide formation of a transcriptional  
293 regulator, consequently affecting expression of genes involved in biofilm formation. Additionally,  
294 in the BSNOR mutant, the BSNO would not be reduced and BSH not released, causing oxidative  
295 stress further affecting the regulation of biofilm formation. Whether this occurs in *S. aureus* needs  
296 further study.

297           The data presented here indicates that the bacillithiol pathway likely interacts with NO and  
298 together they play key roles in biofilm formation in *S. aureus*. Further characterization of the  
299 mechanistic details of this interaction and a search for a transcriptional regulator or other proteins  
300 that link these pathways will further our understanding of oxidative and nitrosative stress  
301 mechanisms in biofilm formation in *S. aureus*, and may lead to the development of novel targets  
302 for therapies to eliminate biofilms in the clinic.

303

## 304 **Materials and Methods**

305 **Strains and culture conditions.** *S. aureus* USA300 (JE2) wild-type cultures were grown from  
306 glycerol stocks on TSA (Tryptic Soy Agar) (BD211825) plates and incubated at 37°C overnight.  
307 Antibiotics were added when appropriate (erythromycin at 10 µg/ml for mutants *bshC* (*NE230*)  
308 and *NE122* disrupted in SAUSA300\_0055, a putative *S*-nitrosobacillithiol reductase. These  
309 transposon mutants were provided by the Network on Antimicrobial Resistance in *Staphylococcus*  
310 *aureus* (NARSA) for distribution by BEI Resources, NIAID, NIH. For all cultures, a single colony  
311 was inoculated in TSB (Tryptic Soy Broth) (BD211825) liquid media and grown at 37°C, shaking  
312 at 250 rpm, for 12 hours. All biofilms, except experiments concerning sodium nitrite, were grown  
313 in TSB media supplemented with 0.75% glucose. For experiments with sodium nitrite, biofilms  
314 were grown in acidified TSB media (pH 5.5) supplemented with 0.75% glucose. Biofilms were  
315 grown as follows: cell cultures grown for 12 hours were diluted to a final OD<sub>600</sub> of 0.2 and added  
316 to all wells excluding blank (no cells added) control wells. The plate was incubated for 60 minutes  
317 at 37°C under static conditions, wells were washed with PBS and 100 µl of media was added. The  
318 plate was incubated for 24 hours at 37°C under static conditions. The media was aspirated, and the  
319 biofilm was measured by OD<sub>600</sub>. Experimental data for each concentration was obtained by

320 subtracting the OD<sub>600</sub> readings of the average blank well of each concentration from each  
321 corresponding experimental well.

322

323 **Minimum inhibitory concentrations (MICs).** For planktonic MICs, DTT (Fisher scientific  
324 BP17225), diamide (MP Biomedicals 0210152705) and sodium nitrite (VWR AA 14244-22) were  
325 serially diluted two-fold from 1M to 61  $\mu$ M in 100  $\mu$ l TSB. Acidified TSB media (pH 5.5) was  
326 used for sodium nitrite. Cell cultures grown for 12 hours, diluted to a final OD<sub>600</sub> of 0.005 and  
327 added to all wells excluding blank (no cells added) control wells. The 384-well plate (Thermo  
328 242765) was incubated at 37°C for 24 hours with no shaking. Eleven replicates were performed  
329 for each concentration and the MIC assay was performed in replicate. The lowest concentration at  
330 which cell turbidity was not visible was determined to be the MIC.

331 For biofilm MIC, DTT, diamide and sodium nitrite were serially diluted two-fold from 1M  
332 to 61.04  $\mu$ M in 100  $\mu$ l TSB, supplemented with 0.75% glucose or 100  $\mu$ l acidified TSB (pH 5.5),  
333 supplemented with 0.75% glucose (for sodium nitrite). Cell cultures grown for 12 hours were  
334 diluted to a final OD<sub>600</sub> of 0.2 and added to all wells excluding blank (no cells added) control wells.  
335 The plate was incubated with no shaking at 37°C for 60 minutes, wells were washed with PBS and  
336 100  $\mu$ l of media with DTT, diamide or sodium nitrite (serially diluted twofold from 1M to 61  $\mu$ M)  
337 was added. The plate was incubated for 24 hours at 37°C under static conditions. The media was  
338 aspirated, and the biofilm was measured by OD<sub>600</sub>. Experimental data for each concentration was  
339 obtained by subtracting the OD<sub>600</sub> readings of average blank well of each concentration from each  
340 corresponding experimental well. The blank subtracted OD<sub>600</sub> values of each experimental well  
341 (10 replicates per concentration) was divided by the blank subtracted OD<sub>600</sub> value of control well

342 (no DTT or diamide added) to obtain normalized values. Reported data represents mean  
343 normalized value and standard deviation.

344

345 **Confocal scanning laser microscopy (CSLM) biofilm visualization.** Cell cultures grown for 12  
346 hours, were diluted to a final OD<sub>600</sub> of 0.2 in 4 ml in a 6-well plate (Falcon 351146). For biofilm  
347 formation without added drugs, JE2, BshC and BsnoR, cells were added to TSB, supplemented  
348 with 0.75% glucose. For biofilms formed in the presence of DTT or diamide, 1.95 mM diamide or  
349 150 mM DTT in TSB supplemented with 0.75% glucose was used. For sodium nitrite experiments,  
350 acidified TSB (pH 5.5) supplemented with 0.75% glucose and 20 mM sodium nitrite or no sodium  
351 nitrite was used. The 6-well plates were incubated for 60 min at 37°C, wells were washed with  
352 PBS and 4 ml of fresh media was added to each well. The plates were incubated for 24 hrs at 37°C  
353 with no shaking. Biofilms were stained with 5 µM Syto9 nucleic acid stain (Thermo Fisher  
354 S34854) for 1 hour at 37°C in the dark. Medium containing the stain was removed, 4 ml of PBS  
355 was added, and biofilms were imaged using an LSM 700 confocal microscope with a 63x  
356 objective. Images were analyzed, and biofilm thicknesses were measured using ZEN software  
357 (Carl Zeiss).

358

359 **Analysis of LMW thiol levels after treatment with sodium nitrite.** *S. aureus* cultures were  
360 grown overnight in tryptic soy broth (TSB) before being diluted in 50 mL acidified TSB (pH 5.5)  
361 to either OD<sub>600</sub> 0.2, or 0.1 and incubated at 37 °C. Quadruplicates were treated with 20 mM sodium  
362 nitrite once cultures reached OD<sub>600</sub> 0.5 for 30 minutes at 37 °C. Immediately after treatment, 10  
363 µL of culture was serial diluted in PBS by 10<sup>-5</sup>, 10<sup>-6</sup>, and 10<sup>-7</sup>, and 50 µL was plated on tryptic soy  
364 agar and incubated at 37 °C to determine if significant killing occurred. The remaining culture was



365 pelleted by centrifugation at 4,000 RPM for 10 minutes at 4°C and the supernatants were removed.  
366 Pellets were stored at -80 °C overnight. LMW thiol analysis was performed on pellets as previously  
367 described (40).

368

369 **Quantative real-time pCR (qPCR).** Expression levels of *katA*, *BSNOR* and *bshC* treated with 20  
370 mM sodium nitrite for 5 min or 30 min in the *S. aureus* wildtype strain were measured by qPCR.  
371 Samples were grown in acidified (pH 5.5) tryptic soy broth (TSB) until they reached an OD<sub>600</sub> of  
372 0.5 before treatment. Relative gene expression was calculated using the  $-2^{\Delta\Delta C_T}$  method ( $\Delta C_T = C_{T_{\text{sample}}} - C_{T_{\text{control}}}$ ) and reported as fold change in gene expression of each sample normalized to the  
373 *gyrB* housekeeping gene relative to the untreated culture. A Mann-Whitney U test was performed  
374 to determine significance  $p < 0.05$ .

376

377 **Acknowledgements.** We thank all members of the Rawat and Nobile labs as well as Aaron  
378 Hernday for insightful discussions and comments on the manuscript. The confocal scanning laser  
379 microscopy images in this work were collected, in part, with the use of a confocal microscope  
380 acquired through the National Science Foundation (NSF) MRI award DMR-1625733. This work  
381 was supported by the National Institutes of Health (NIH) National Institute of General Medical  
382 Sciences (NIGMS) award R35GM124594 to CJN, and by the NIH NIGMS award SC3GM100855  
383 and National Science Foundation (NSF) award MCB 1244611 to MR. The funders had no role in  
384 study design, data collection and interpretation, or the decision to submit the work for publication.

385

386 **Conflict of Interest.** Clarissa J. Nobile is a cofounder of BioSynesis, Inc., a company developing  
387 inhibitors and diagnostics of biofilm formation, and Megha Gulati is a consultant of BioSynesis,  
388 Inc.

389

## 390 **References**

- 391 1. Lowy FD. 1998. Staphylococcus aureus infections. *N Engl J Med* 339:520-32.
- 392 2. Tong SY, Davis JS, Eichenberger E, Holland TL, Fowler VG, Jr. 2015. Staphylococcus  
393 aureus infections: epidemiology, pathophysiology, clinical manifestations, and  
394 management. *Clin Microbiol Rev* 28:603-61.
- 395 3. Kluytmans J, van Belkum A, Verbrugh H. 1997. Nasal carriage of Staphylococcus aureus:  
396 epidemiology, underlying mechanisms, and associated risks. *Clin Microbiol Rev* 10:505-  
397 20.
- 398 4. Sollid JU, Furberg AS, Hanssen AM, Johannessen M. 2014. Staphylococcus aureus:  
399 determinants of human carriage. *Infect Genet Evol* 21:531-41.
- 400 5. Johannessen M, Sollid JE, Hanssen AM. 2012. Host- and microbe determinants that may  
401 influence the success of S. aureus colonization. *Front Cell Infect Microbiol* 2:56.
- 402 6. Ellis MW, Schlett CD, Millar EV, Crawford KB, Cui T, Lanier JB, Tribble DR. 2014.  
403 Prevalence of nasal colonization and strain concordance in patients with community-  
404 associated Staphylococcus aureus skin and soft-tissue infections. *Infect Control Hosp*  
405 *Epidemiol* 35:1251-6.
- 406 7. Archer NK, Mazaitis MJ, Costerton JW, Leid JG, Powers ME, Shirtliff ME. 2011.  
407 Staphylococcus aureus biofilms: properties, regulation, and roles in human disease.  
408 *Virulence* 2:445-59.

- 409 8. Lister JL, Horswill AR. 2014. Staphylococcus aureus biofilms: recent developments in  
410 biofilm dispersal. *Front Cell Infect Microbiol* 4:178.
- 411 9. Watters C, Fleming D, Bishop D, Rumbaugh KP. 2016. Host Responses to Biofilm. *Prog*  
412 *Mol Biol Transl Sci* 142:193-239.
- 413 10. Gil C, Solano C, Burgui S, Latasa C, Garcia B, Toledo-Arana A, Lasa I, Valle J. 2014.  
414 Biofilm matrix exoproteins induce a protective immune response against Staphylococcus  
415 aureus biofilm infection. *Infect Immun* 82:1017-29.
- 416 11. Marrie TJ, Nelligan J, Costerton JW. 1982. A scanning and transmission electron  
417 microscopic study of an infected endocardial pacemaker lead. *Circulation* 66:1339-41.
- 418 12. Otto M. 2008. Staphylococcal biofilms. *Curr Top Microbiol Immunol* 322:207-28.
- 419 13. Otto M. 2018. Staphylococcal Biofilms. *Microbiol Spectr* 6.
- 420 14. Costerton JW, Stewart PS, Greenberg EP. 1999. Bacterial biofilms: a common cause of  
421 persistent infections. *Science* 284:1318-22.
- 422 15. Klevens RM, Morrison MA, Nadle J, Petit S, Gershman K, Ray S, Harrison LH, Lynfield  
423 R, Dumyati G, Townes JM, Craig AS, Zell ER, Fosheim GE, McDougal LK, Carey RB,  
424 Fridkin SK, Active Bacterial Core surveillance MI. 2007. Invasive methicillin-resistant  
425 Staphylococcus aureus infections in the United States. *JAMA* 298:1763-71.
- 426 16. Graffunder EM, Venezia RA. 2002. Risk factors associated with nosocomial methicillin-  
427 resistant Staphylococcus aureus (MRSA) infection including previous use of  
428 antimicrobials. *J Antimicrob Chemother* 49:999-1005.
- 429 17. DeLeo FR, Diep BA, Otto M. 2009. Host defense and pathogenesis in Staphylococcus  
430 aureus infections. *Infect Dis Clin North Am* 23:17-34.

- 431 18. Beavers WN, Skaar EP. 2016. Neutrophil-generated oxidative stress and protein damage  
432 in *Staphylococcus aureus*. *Pathog Dis* 74.
- 433 19. Fournier B, Philpott DJ. 2005. Recognition of *Staphylococcus aureus* by the innate immune  
434 system. *Clin Microbiol Rev* 18:521-40.
- 435 20. Guerra FE, Borgogna TR, Patel DM, Sward EW, Voyich JM. 2017. Epic Immune Battles  
436 of History: Neutrophils vs. *Staphylococcus aureus*. *Front Cell Infect Microbiol* 7:286.
- 437 21. Kobayashi SD, Malachowa N, DeLeo FR. 2015. Pathogenesis of *Staphylococcus aureus*  
438 abscesses. *Am J Pathol* 185:1518-27.
- 439 22. Nguyen GT, Green ER, Mecsas J. 2017. Neutrophils to the ROScue: Mechanisms of  
440 NADPH Oxidase Activation and Bacterial Resistance. *Front Cell Infect Microbiol* 7:373.
- 441 23. Arce Miranda JE, Sotomayor CE, Albesa I, Paraje MG. 2011. Oxidative and nitrosative  
442 stress in *Staphylococcus aureus* biofilm. *FEMS Microbiol Lett* 315:23-9.
- 443 24. Manda-Handzlik A, Demkow U. 2015. Neutrophils: The Role of Oxidative and Nitrosative  
444 Stress in Health and Disease. *Adv Exp Med Biol* 857:51-60.
- 445 25. Pollock JD, Williams DA, Gifford MA, Li LL, Du X, Fisherman J, Orkin SH, Doerschuk  
446 CM, Dinauer MC. 1995. Mouse model of X-linked chronic granulomatous disease, an  
447 inherited defect in phagocyte superoxide production. *Nat Genet* 9:202-9.
- 448 26. Jackson SH, Gallin JI, Holland SM. 1995. The p47phox mouse knock-out model of chronic  
449 granulomatous disease. *J Exp Med* 182:751-8.
- 450 27. Robinson JM. 2008. Reactive oxygen species in phagocytic leukocytes. *Histochem Cell*  
451 *Biol* 130:281-97.
- 452 28. Gaupp R, Ledala N, Somerville GA. 2012. Staphylococcal response to oxidative stress.  
453 *Front Cell Infect Microbiol* 2:33.

- 454 29. Gresham HD, Lowrance JH, Caver TE, Wilson BS, Cheung AL, Lindberg FP. 2000.  
455 Survival of *Staphylococcus aureus* inside neutrophils contributes to infection. *J Immunol*  
456 164:3713-22.
- 457 30. Richardson AR, Libby SJ, Fang FC. 2008. A nitric oxide-inducible lactate dehydrogenase  
458 enables *Staphylococcus aureus* to resist innate immunity. *Science* 319:1672-6.
- 459 31. Richardson AR, Dunman PM, Fang FC. 2006. The nitrosative stress response of  
460 *Staphylococcus aureus* is required for resistance to innate immunity. *Mol Microbiol*  
461 61:927-39.
- 462 32. Birben E, Sahiner UM, Sackesen C, Erzurum S, Kalayci O. 2012. Oxidative stress and  
463 antioxidant defense. *World Allergy Organ J* 5:9-19.
- 464 33. Perera VR, Newton GL, Pogliano K. 2015. Bacillithiol: a key protective thiol in  
465 *Staphylococcus aureus*. *Expert Rev Anti Infect Ther* 13:1089-107.
- 466 34. Masip L, Veeravalli K, Georgiou G. 2006. The many faces of glutathione in bacteria.  
467 *Antioxid Redox Signal* 8:753-62.
- 468 35. Fahey RC, Brown WC, Adams WB, Worsham MB. 1978. Occurrence of glutathione in  
469 bacteria. *J Bacteriol* 133:1126-9.
- 470 36. Newton GL, Arnold K, Price MS, Sherrill C, Delcardayre SB, Aharonowitz Y, Cohen G,  
471 Davies J, Fahey RC, Davis C. 1996. Distribution of thiols in microorganisms: mycothiol is  
472 a major thiol in most actinomycetes. *J Bacteriol* 178:1990-5.
- 473 37. Newton GL, Buchmeier N, Fahey RC. 2008. Biosynthesis and functions of mycothiol, the  
474 unique protective thiol of Actinobacteria. *Microbiol Mol Biol Rev* 72:471-94.

- 475 38. Newton GL, Rawat M, La Clair JJ, Jothivasan VK, Budiarto T, Hamilton CJ, Claiborne A,  
476 Helmann JD, Fahey RC. 2009. Bacillithiol is an antioxidant thiol produced in Bacilli. *Nat*  
477 *Chem Biol* 5:625-7.
- 478 39. Gaballa A, Newton GL, Antelmann H, Parsonage D, Upton H, Rawat M, Claiborne A,  
479 Fahey RC, Helmann JD. 2010. Biosynthesis and functions of bacillithiol, a major low-  
480 molecular-weight thiol in Bacilli. *Proc Natl Acad Sci U S A* 107:6482-6.
- 481 40. Rajkarnikar A, Strankman A, Duran S, Vargas D, Roberts AA, Barretto K, Upton H,  
482 Hamilton CJ, Rawat M. 2013. Analysis of mutants disrupted in bacillithiol metabolism in  
483 *Staphylococcus aureus*. *Biochem Biophys Res Commun* 436:128-33.
- 484 41. Posada AC, Kolar SL, Dusi RG, Francois P, Roberts AA, Hamilton CJ, Liu GY, Cheung  
485 A. 2014. Importance of bacillithiol in the oxidative stress response of *Staphylococcus*  
486 *aureus*. *Infect Immun* 82:316-32.
- 487 42. Poole RK. 2005. Nitric oxide and nitrosative stress tolerance in bacteria. *Biochem Soc*  
488 *Trans* 33:176-80.
- 489 43. Broniowska KA, Diers AR, Hogg N. 2013. S-nitrosoglutathione. *Biochim Biophys Acta*  
490 1830:3173-81.
- 491 44. Strocher UH, Kidd SP, Stafford SL, Jennings MP, Paton JC, McEwan AG. 2007. A  
492 pneumococcal MerR-like regulator and S-nitrosoglutathione reductase are required for  
493 systemic virulence. *J Infect Dis* 196:1820-6.
- 494 45. Vaish M, Singh VK. 2013. Antioxidant Functions of Nitric Oxide Synthase in a Methicillin  
495 Sensitive *Staphylococcus aureus*. *Int J Microbiol* 2013:312146.

- 496 46. Urbano R, Karlinsey JE, Libby SJ, Doulias PT, Ischiropoulos H, Warheit-Niemi HI, Liggitt  
497 DH, Horswill AR, Fang FC. 2018. Host Nitric Oxide Disrupts Microbial Cell-to-Cell  
498 Communication to Inhibit Staphylococcal Virulence. *Cell Host Microbe* 23:594-606 e7.
- 499 47. Mogen AB, Carroll RK, James KL, Lima G, Silva D, Culver JA, Petucci C, Shaw LN, Rice  
500 KC. 2017. Staphylococcus aureus nitric oxide synthase (saNOS) modulates aerobic  
501 respiratory metabolism and cell physiology. *Mol Microbiol* 105:139-157.
- 502 48. Kinkel TL, Ramos-Montanez S, Pando JM, Tadeo DV, Strom EN, Libby SJ, Fang FC.  
503 2016. An essential role for bacterial nitric oxide synthase in Staphylococcus aureus electron  
504 transfer and colonization. *Nat Microbiol* 2:16224.
- 505 49. van Sorge NM, Beasley FC, Gusarov I, Gonzalez DJ, von Kockritz-Blickwede M, Anik S,  
506 Borkowski AW, Dorrestein PC, Nudler E, Nizet V. 2013. Methicillin-resistant  
507 Staphylococcus aureus bacterial nitric-oxide synthase affects antibiotic sensitivity and skin  
508 abscess development. *J Biol Chem* 288:6417-26.
- 509 50. Sapp AM, Mogen AB, Almand EA, Rivera FE, Shaw LN, Richardson AR, Rice KC. 2014.  
510 Contribution of the nos-pdt operon to virulence phenotypes in methicillin-sensitive  
511 Staphylococcus aureus. *PLoS One* 9:e108868.
- 512 51. Arora DP, Hossain S, Xu Y, Boon EM. 2015. Nitric Oxide Regulation of Bacterial  
513 Biofilms. *Biochemistry* 54:3717-28.
- 514 52. Barraud N, Kelso MJ, Rice SA, Kjelleberg S. 2015. Nitric oxide: a key mediator of biofilm  
515 dispersal with applications in infectious diseases. *Curr Pharm Des* 21:31-42.
- 516 53. Schlag S, Nerz C, Birkenstock TA, Altenberend F, Gotz F. 2007. Inhibition of  
517 staphylococcal biofilm formation by nitrite. *J Bacteriol* 189:7911-9.

- 518 54. Barraud N, Hassett DJ, Hwang SH, Rice SA, Kjelleberg S, Webb JS. 2006. Involvement  
519 of nitric oxide in biofilm dispersal of *Pseudomonas aeruginosa*. *J Bacteriol* 188:7344-53.
- 520 55. Zhu X, Oh HS, Ng YCB, Tang PYP, Barraud N, Rice SA. 2018. Nitric Oxide-Mediated  
521 Induction of Dispersal in *Pseudomonas aeruginosa* Biofilms Is Inhibited by  
522 Flavohemoglobin Production and Is Enhanced by Imidazole. *Antimicrob Agents*  
523 *Chemother* 62.
- 524 56. Vargas D, Hageman S, Gulati M, Nobile CJ, Rawat M. 2016. S-nitrosomycothiols reductase  
525 and mycothiol are required for survival under aldehyde stress and biofilm formation in  
526 *Mycobacterium smegmatis*. *IUBMB Life* 68:621-8.
- 527 57. Van Laar TA, Esani S, Birges TJ, Hazen B, Thomas JM, Rawat M. 2018. *Pseudomonas*  
528 *aeruginosa* gshA Mutant Is Defective in Biofilm Formation, Swarming, and Pyocyanin  
529 Production. *mSphere* 3.
- 530 58. Liu L, Hausladen A, Zeng M, Que L, Heitman J, Stamler JS. 2001. A metabolic enzyme  
531 for S-nitrosothiol conserved from bacteria to humans. *Nature* 410:490-4.
- 532 59. Vogt RN, Steenkamp DJ, Zheng R, Blanchard JS. 2003. The metabolism of nitrosothiols  
533 in the Mycobacteria: identification and characterization of S-nitrosomycothiols reductase.  
534 *Biochem J* 374:657-66.
- 535 60. Zweier JL, Wang P, Samouilov A, Kuppusamy P. 1995. Enzyme-independent formation  
536 of nitric oxide in biological tissues. *Nat Med* 1:804-9.
- 537 61. Lohse MB, Gulati M, Valle Arevalo A, Fishburn A, Johnson AD, Nobile CJ. 2017.  
538 Assessment and Optimizations of *Candida albicans* In Vitro Biofilm Assays. *Antimicrob*  
539 *Agents Chemother* 61.



- 540 62. Murillo LA, Newport G, Lan CY, Habelitz S, Dungan J, Agabian NM. 2005. Genome-  
541 wide transcription profiling of the early phase of biofilm formation by *Candida albicans*.  
542 *Eukaryot Cell* 4:1562-73.
- 543 63. Trivedi A, Mavi PS, Bhatt D, Kumar A. 2016. Thiol reductive stress induces cellulose-  
544 anchored biofilm formation in *Mycobacterium tuberculosis*. *Nat Commun* 7:11392.
- 545 64. Wu X, Wang Y, Tao L. 2011. Sulfhydryl compounds reduce *Staphylococcus aureus*  
546 biofilm formation by inhibiting PIA biosynthesis. *FEMS Microbiol Lett* 316:44-50.
- 547 65. Keszler A, Zhang Y, Hogg N. 2010. Reaction between nitric oxide, glutathione, and  
548 oxygen in the presence and absence of protein: How are S-nitrosothiols formed? *Free Radic*  
549 *Biol Med* 48:55-64.
- 550 66. Yang J, Carroll KS, Liebler DC. 2016. The Expanding Landscape of the Thiol Redox  
551 Proteome. *Mol Cell Proteomics* 15:1-11.
- 552 67. Benhar M, Forrester MT, Stamler JS. 2009. Protein denitrosylation: enzymatic  
553 mechanisms and cellular functions. *Nat Rev Mol Cell Biol* 10:721-32.
- 554 68. Major TA, Panmanee W, Mortensen JE, Gray LD, Hoglen N, Hassett DJ. 2010. Sodium  
555 nitrite-mediated killing of the major cystic fibrosis pathogens *Pseudomonas aeruginosa*,  
556 *Staphylococcus aureus*, and *Burkholderia cepacia* under anaerobic planktonic and biofilm  
557 conditions. *Antimicrob Agents Chemother* 54:4671-7.
- 558 69. Huyen TT, Eiamphungporn W, Mäder U, Liebeke M, Lalk M, Hecker M, Helmann JD,  
559 Antelmann H. 2009. Genome-wide responses to carbonyl electrophiles in *Bacillus subtilis*:  
560 control of the thiol-dependent formaldehyde dehydrogenase AdhA and cysteine proteinase  
561 YraA by the MerR-family regulator YraB (AdhR). *Mol Microbiol* 71:876-94.

- 562 70. Patra SK, Bag PK, Ghosh S. 2017. Nitrosative Stress Response in *Vibrio cholerae*: Role of  
563 S-Nitrosoglutathione Reductase. *Appl Biochem Biotechnol* 182:871-884.
- 564 71. Frungillo L, Skelly MJ, Loake GJ, Spoel SH, Salgado I. 2014. S-nitrosothiols regulate  
565 nitric oxide production and storage in plants through the nitrogen assimilation pathway.  
566 *Nat Commun* 5:5401.
- 567 72. Chen NH, Counago RM, Djoko KY, Jennings MP, Apicella MA, Kobe B, McEwan AG.  
568 2013. A glutathione-dependent detoxification system is required for formaldehyde  
569 resistance and optimal survival of *Neisseria meningitidis* in biofilms. *Antioxid Redox*  
570 *Signal* 18:743-55.
- 571 73. Gupta A, Fuentes SM, Grove A. 2017. Redox-Sensitive MarR Homologue BifR from  
572 *Burkholderia thailandensis* Regulates Biofilm Formation. *Biochemistry* 56:2315-2327.

## 573 Tables

574 Table 1

| Strain | MIC Planktonic |              |                | MIC Biofilm |         |                |
|--------|----------------|--------------|----------------|-------------|---------|----------------|
|        | DTT            | Diamide      | Sodium Nitrite | DTT         | Diamide | Sodium Nitrite |
| JE2    | 250 mM         | 3.91 $\mu$ M | 31.25 mM       | 250 mM      | 7.81 mM | 31.25 mM       |
| BshC   | 250 mM         | 3.91 $\mu$ M | 31.25 mM       | 250 mM      | 7.81 mM | 62.50 mM       |
| BsnoR  | 250 mM         | 3.91 $\mu$ M | 31.25 mM       | 250 mM      | 7.81 mM | 31.25 mM       |

575

576

## 577 Figure Legends

578 **Figure 1 – Reduced Bacillithiol level in the BSNOR mutant after treatment with sodium**  
579 **nitrite.** BSH levels measured in *S. aureus* wild type (WT) cells and BSNOR mutant using HPLC  
580 analysis. BSH levels were measured in both cell types with no treatment and following treatment  
581 with sublethal concentrations of sodium nitrite (20 mM). The experiment was performed in

582 quadruplicate and data presented represents mean and standard deviation. The right axis indicates  
583 the CFU/mL count which is represented by the triangle with error bars for standard deviation. The  
584 left axis indicates the bacillithiol concentrations that are represented by bars with standard  
585 deviation error bars. A student t-test was performed to determine significance; p-values  $\leq 0.05$  (\*).

586

587 **Figure 2 – Expression levels of *BSNOR*, *bshC*, and *katA* genes under various stressors.** A.

588 Expression of *BSNOR*, *bshC*, and *katA* treated with 20 mM sodium nitrite for 5 min or 30 min in

589 *S. aureus* wildtype. B. Expression of *BSNOR*, *katA* and *bshC* under oxidative stress (5 mM

590 diamide, 100  $\mu$ M cumene hydroperoxide, and 100  $\mu$ M H<sub>2</sub>O<sub>2</sub> for 30 min) in *S. aureus* wildtype.

591 Relative gene expression was calculated using the  $2^{-\Delta\Delta CT}$  method ( $\Delta Ct = Ct_{\text{sample}} - Ct_{\text{control}}$ )

592 and reported as fold change in gene expression of each sample normalized to the *gyrB*

593 housekeeping gene relative to the untreated culture. A Mann-Whitney U test was performed to

594 determine significance; p-values  $\leq 0.05$  (\*).

595

596 **Figure 3 – Confocal scanning laser microscopy (CSLM) images of *S. aureus* 24 hr biofilms.**

597 Images show depth (side view) and top view of biofilms formed by wild-type JE2 (A and D),

598  $\Delta bshC$  (B and E), and  $\Delta bsnoR$  (C and F). Biofilms were formed on the bottom of 6-well

599 polystyrene plates and stained with 2  $\mu$ M Syto9 for 1 hr in the dark. Biofilms were imaged using

600 an LSM-700 confocal microscope with a 63x objective and analyzed using ZEN software. Scale

601 bars are shown in white in each panel and represent 5  $\mu$ m.

602

603 **Figure 4 – Effects of sublethal concentrations of DTT and diamide on *S. aureus* biofilms by**

604 **CSLM.** Images show depth (side view) and top view of biofilms formed by wild-type JE2 in TSB

605 media supplemented with 0.75% glucose (TSB-G) (A and D), TSB-G media and 150mM DTT (B  
606 and E), and TSB-G media with 1.95 mM diamide (C and F). Biofilms were formed on the bottom  
607 of 6-well polystyrene plates and stained with 2  $\mu$ M Syto9 for 1 hr in the dark. Biofilms were  
608 imaged using an LSM-700 confocal microscope with a 63x objective and analyzed using ZEN  
609 software. Scale bars are shown in white in each panel and represent 5  $\mu$ m.

610

611 **Figure 5 – Effect of sublethal concentration of sodium nitrite on *S. aureus* biofilms by CSLM.**

612 Images show depth (side view) and top view of biofilms formed by wild-type JE2 in acidified TSB  
613 media supplemented with 0.75% glucose (aTSB-G) (A and C), and TSB-G media and 20mM  
614 sodium nitrite (B and D). Biofilms were formed on the bottom of 6-well polystyrene plates and  
615 stained with 2  $\mu$ M Syto9 for 1 hr in the dark. Biofilms were imaged using an LSM-700 confocal  
616 microscope with a 63x objective and analyzed using ZEN software. Scale bars are shown in white  
617 in each panel and represent 5  $\mu$ m.

618

619 **Supplemental Figure 1 – *S. aureus* cultures grown in nutrient rich media.** Overnight cultures  
620 were grown in tryptic soy broth (TSB) at 37°C while shaking before being diluted to OD<sub>600</sub> 0.05  
621 in 200  $\mu$ L in a 96-well plate with indicated treatments. *S. aureus* wildtype (green), *bshC*<sup>-</sup> (blue),  
622 and *BSNOR*<sup>-</sup> (purple) were incubated at 37°C for 24 hrs with reads every hour. *S. aureus* was either  
623 non-treated, treated with GSNO at 1 mM or 5 mM, treated with formaldehyde at 0.25 mM, 0.75  
624 mM, or 1.5 mM, treated with acidified sodium nitrite pH 5.5 (20 mM), or treated with  
625 methylglyoxal at 0.75 mM or 1.5 mM.

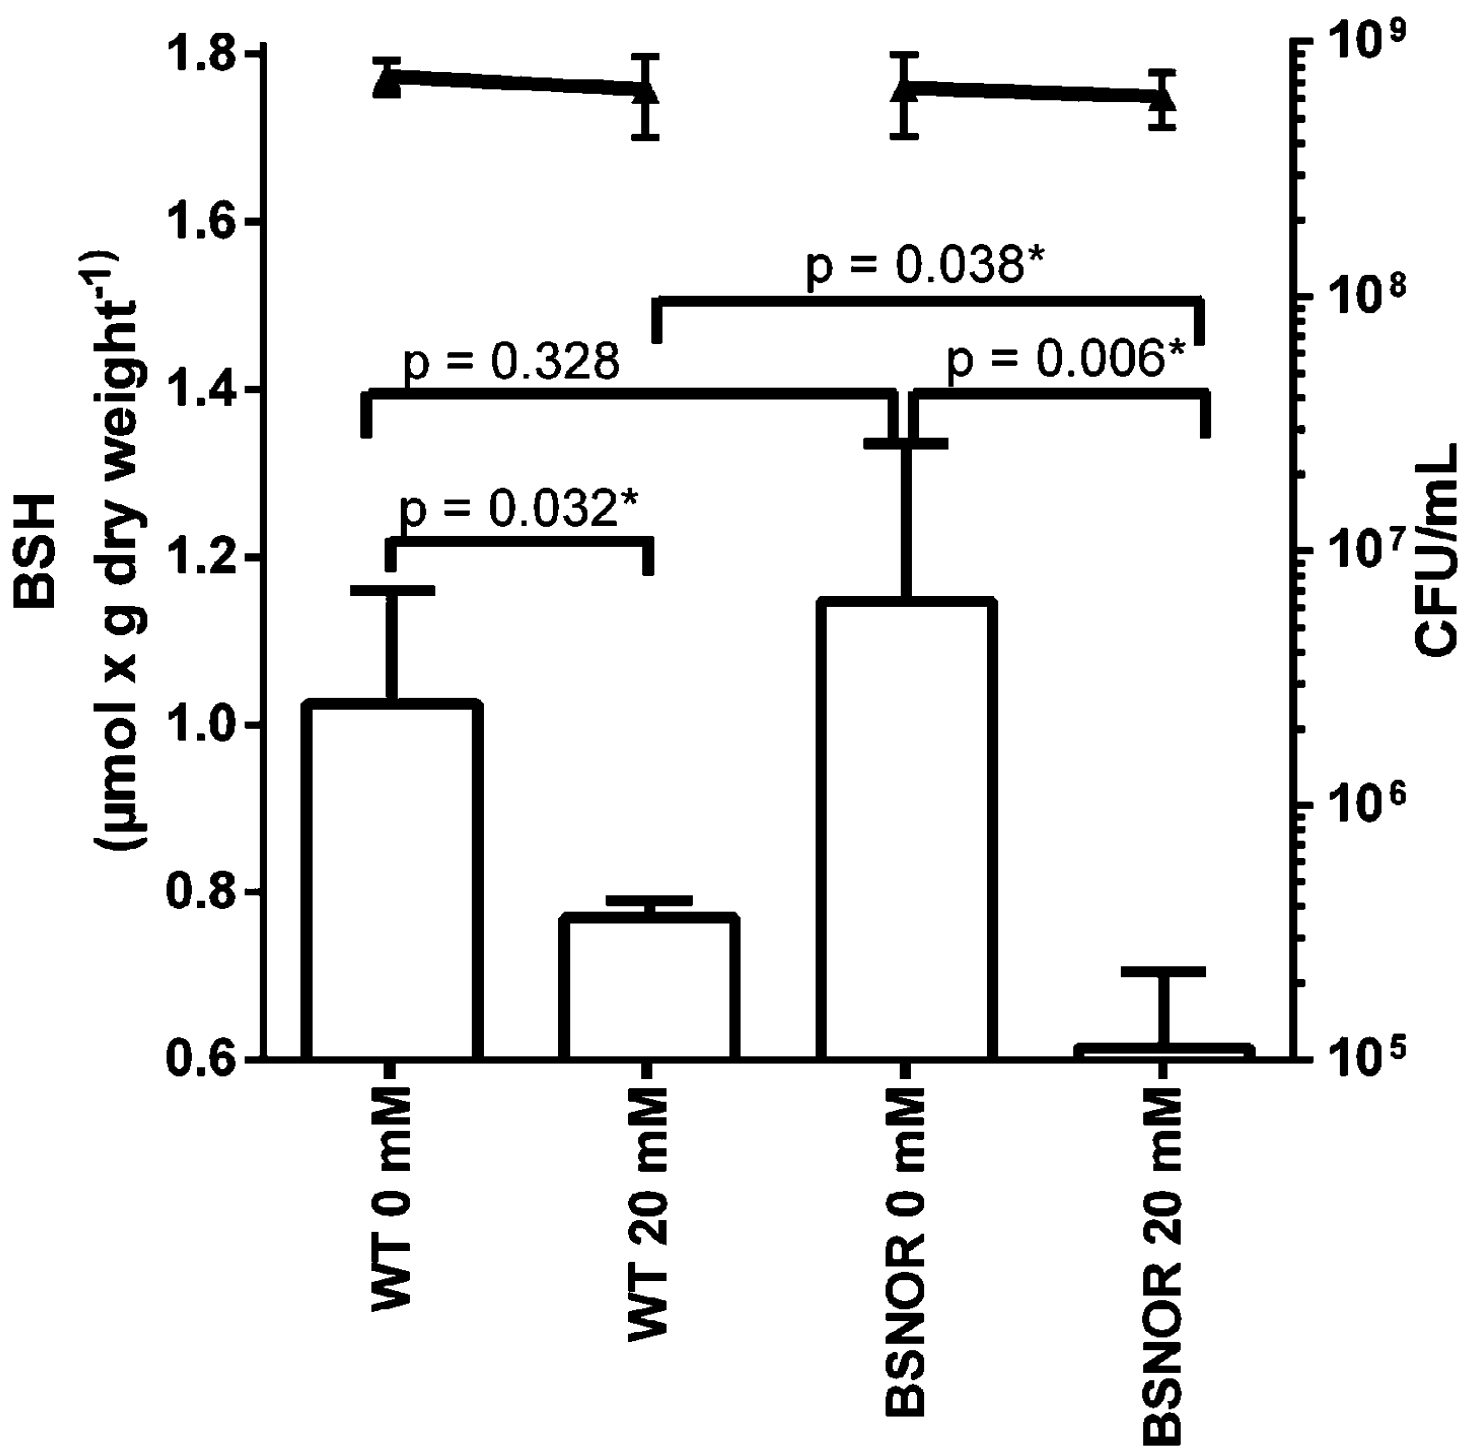

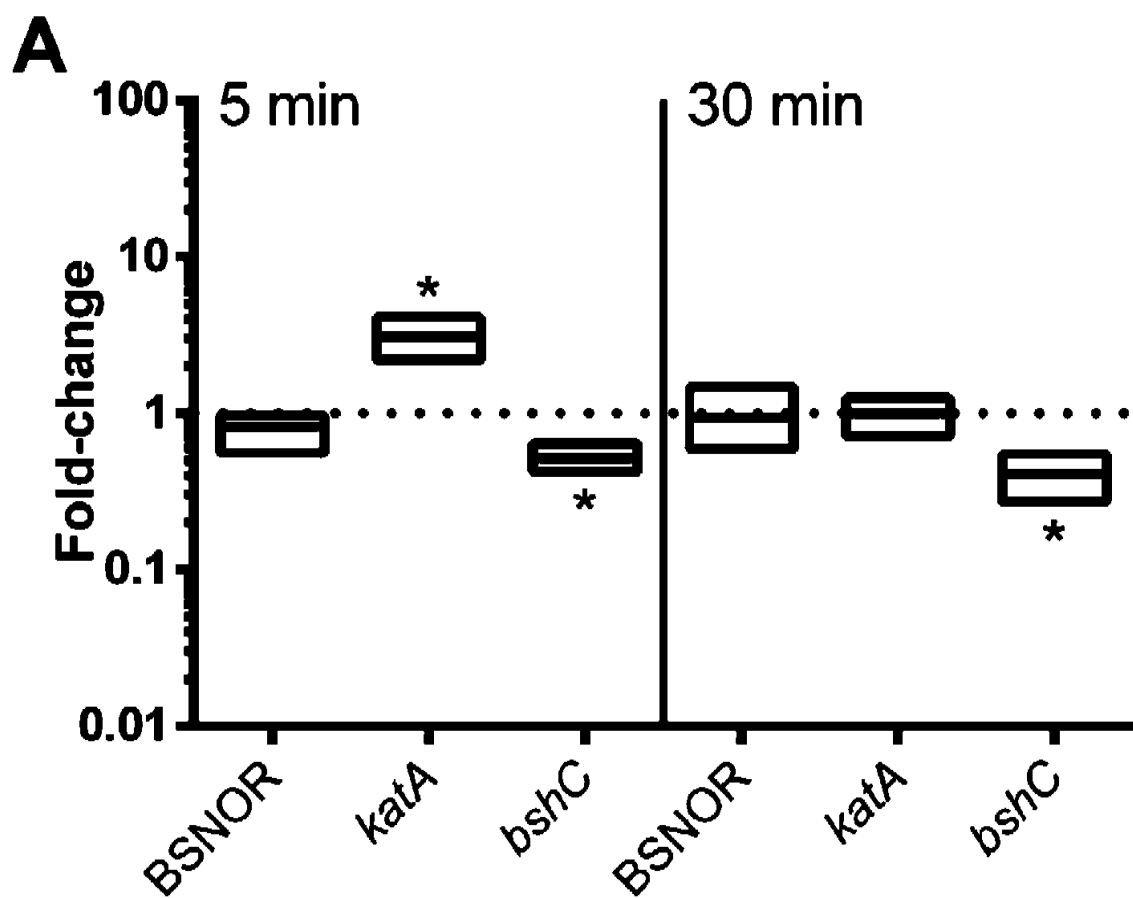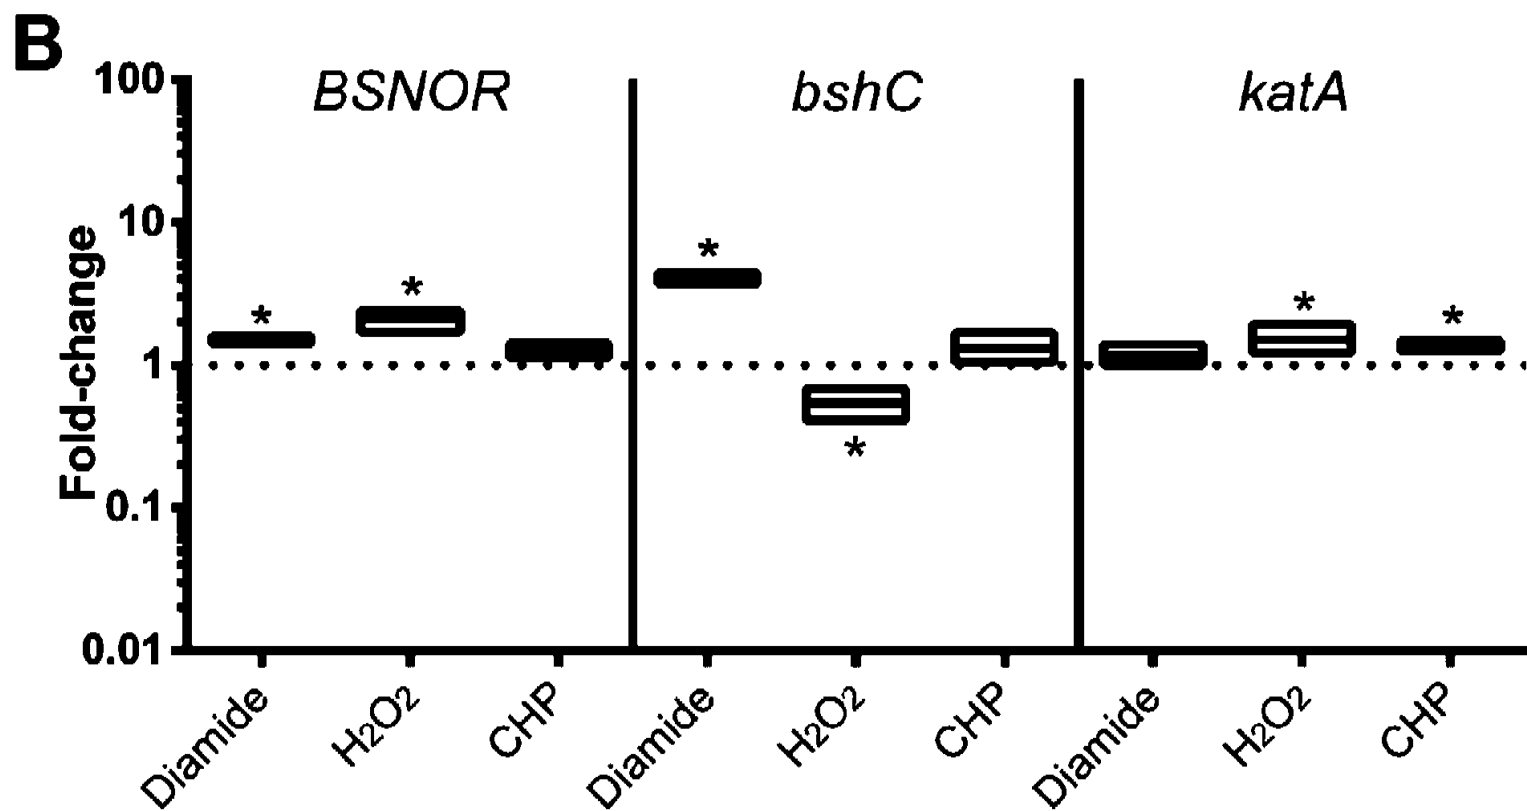

A

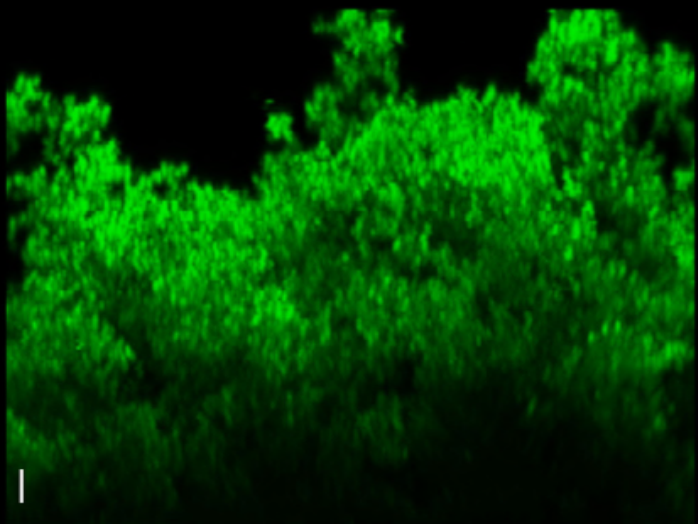

B

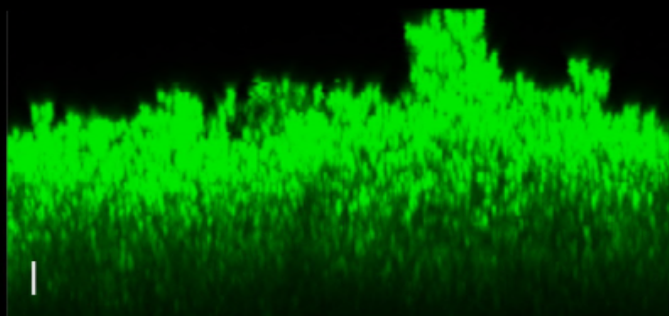

C

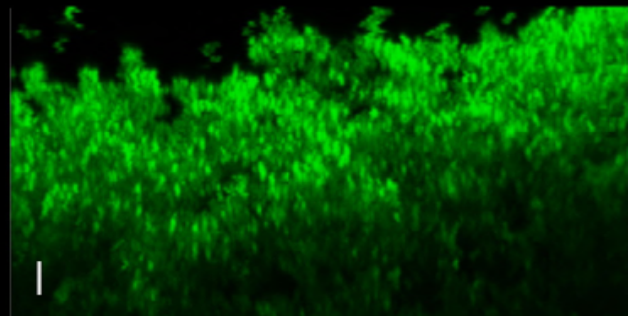

D

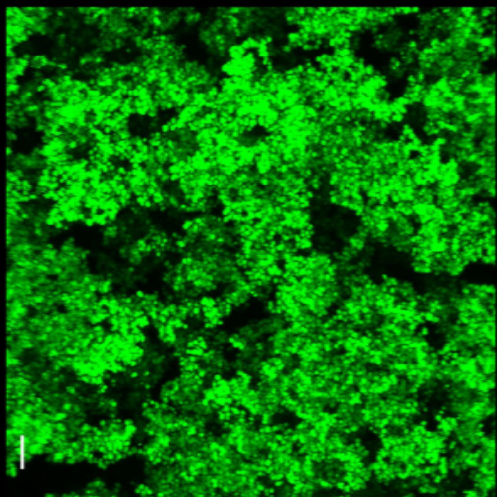

E

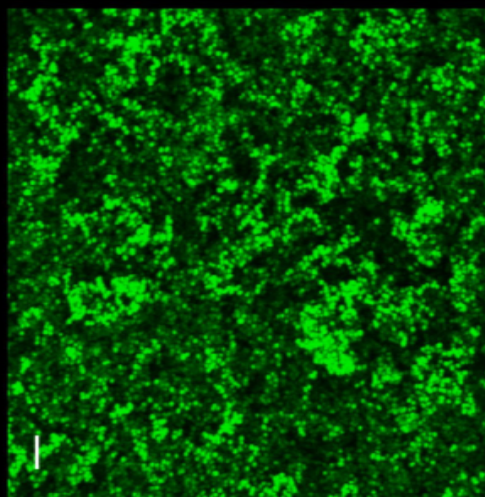

F

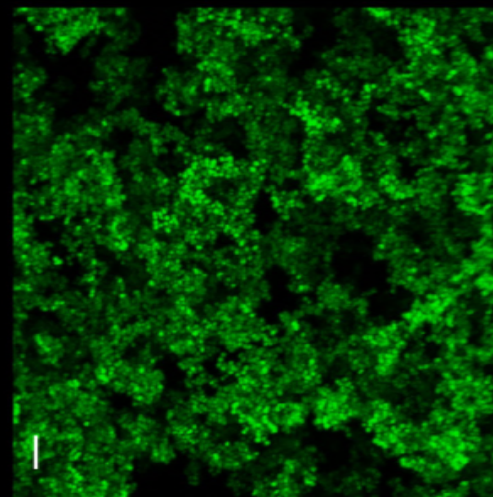



A

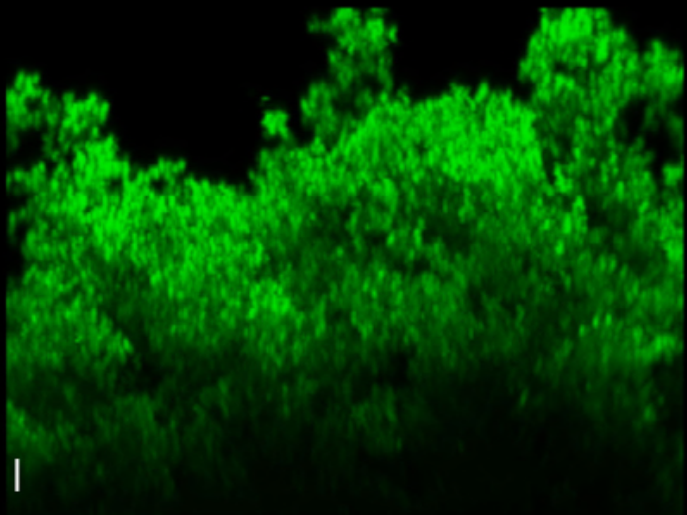

B

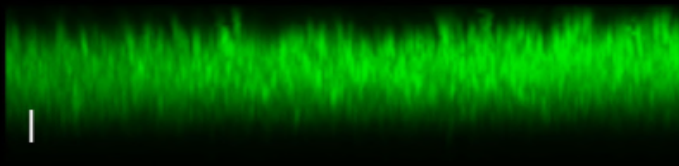

C

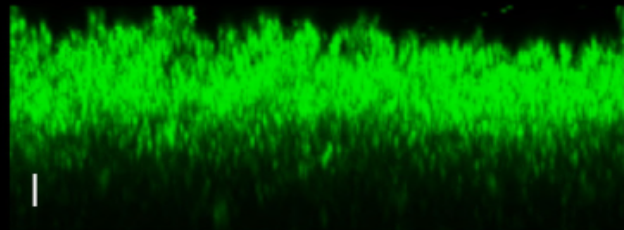

D

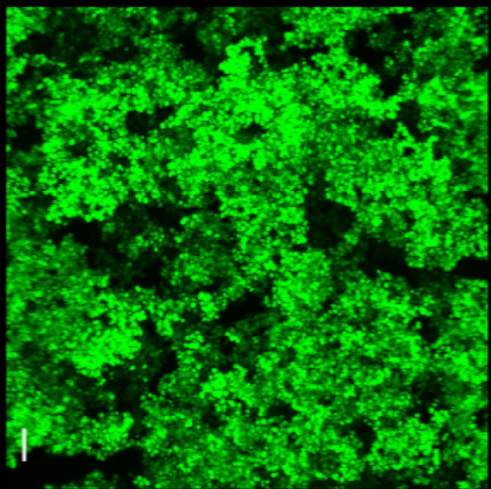

E

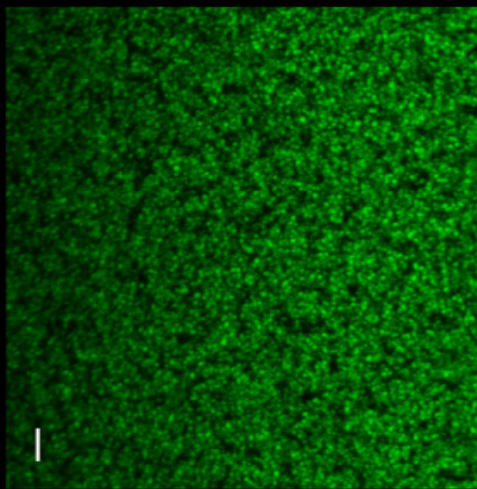

F

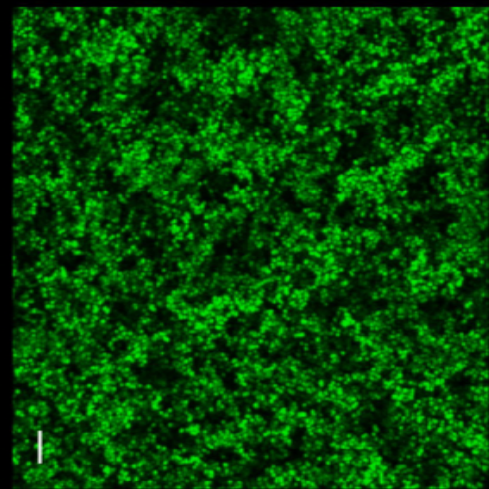



A

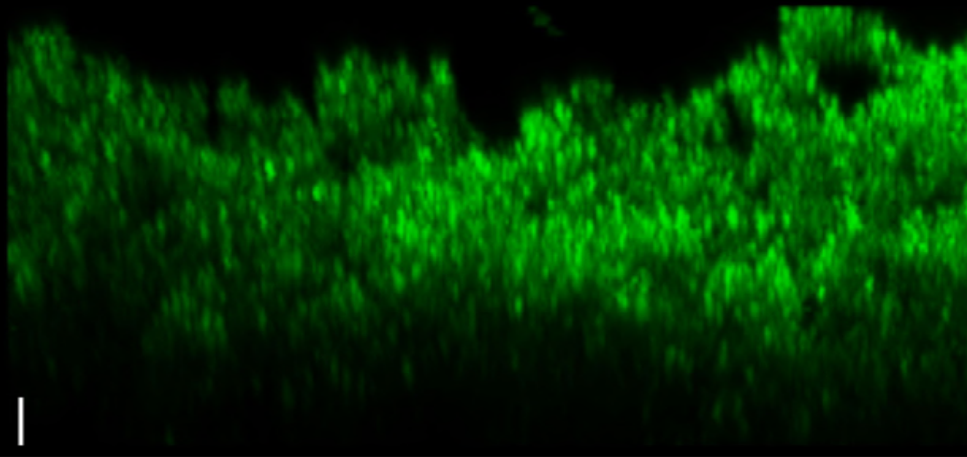

B

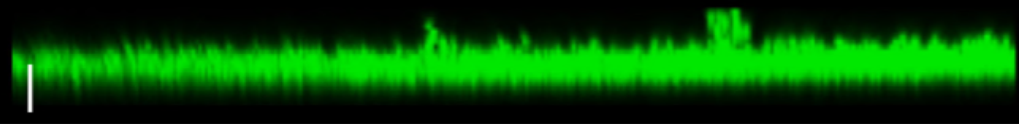

C

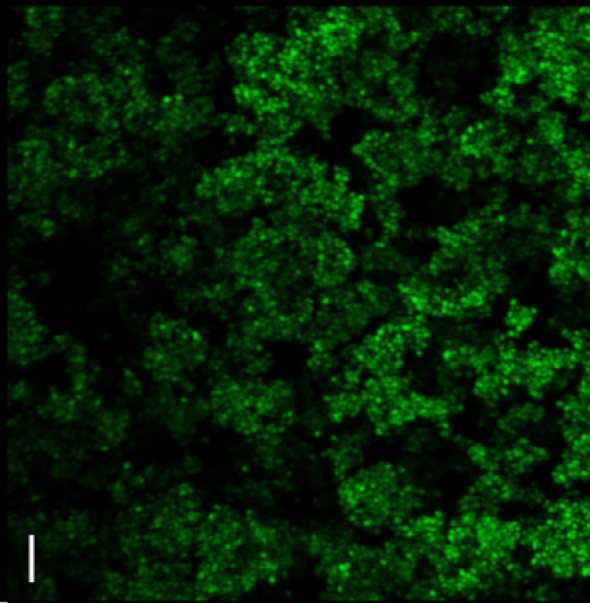

D

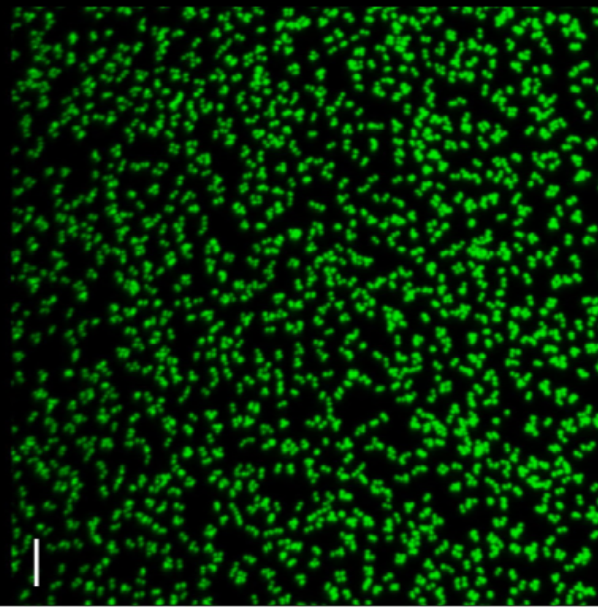

Source: https://www.biorxiv.org/content/10.1101/496653v1.full.pdf
